# Supplementary material
Source: bioRxiv or medRxiv preprint supplement (https://www.biorxiv.org/highwire/filestream/52843/field_highwire_adjunct_files/1/175505-10.pdf)

Supplementary Figure 4

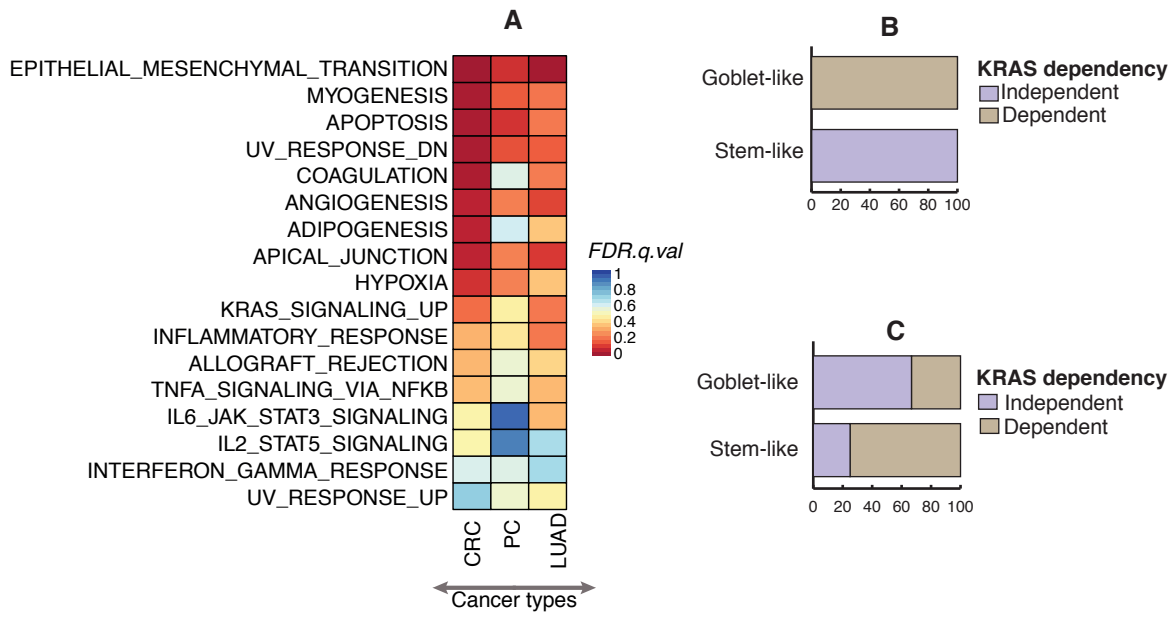

Supplement: Supplementary file [file 175505-10.pdf]
